# Supplementary material for: Characterization of 9-Nitrocamptothecin Liposomes: Anticancer Properties and Mechanisms on Hepatocellular Carcinoma In Vitro and In Vivo
Source: PubMed Central journal article supplement (PMC3111480; doi:10.1371/journal.pone.0021064), 2011-06-09
Supplement: pone.0021064.s001.pdf [file pone.0021064.s001.pdf]

**Table S1. Effects of 9NC and 9NC-LP on the cell cycle progression**

| Test compounds  |        |                        | HepG2       |             |             |             | Bel-7402    |             |             |             | Hep3B       |             |             |             | L02         |             |             |             |
|-----------------|--------|------------------------|-------------|-------------|-------------|-------------|-------------|-------------|-------------|-------------|-------------|-------------|-------------|-------------|-------------|-------------|-------------|-------------|
| Incubation time | Name   | Concentration (μmol/L) | SubG1       | G1          | S           | G2/M        | SubG1       | G1          | S           | G2/M        | SubG1       | G1          | S           | G2/M        | SubG1       | G1          | S           | G2/M        |
| 24h             | 9NC    | Control                | 1.73±0.27   | 57.37±2.18  | 33.07±1.31  | 9.57±1.49   | 1.39±0.44   | 55.31±1.62  | 33.14±1.26  | 11.56±1.41  | 0.26±0.21   | 54.07±2.09  | 25.12±1.61  | 20.81±1.37  | 0.35±0.21   | 60.89±1.14  | 30.94±1.95  | 8.16±1.03   |
|                 |        | 0.01                   | 2.80±0.42*  | 53.64±3.40  | 33.38±3.41  | 12.99±1.21* | 2.18±0.69   | 51.93±2.45  | 34.38±2.26  | 13.68±1.72  | 0.32±0.17   | 57.30±2.66  | 24.95±1.55  | 17.75±2.02  | 0.33±0.19   | 44.22±2.01† | 38.67±2.81* | 17.11±1.06† |
|                 |        | 0.025                  | 6.73±0.49†  | 0.09±1.12†  | 55.21±3.72† | 44.71±3.41† | 5.62±0.39†  | 7.84±0.49†  | 43.46±2.17† | 48.69±2.07† | 0.35±0.23   | 56.84±2.32  | 24.62±1.36  | 18.54±1.92  | 0.31±0.22   | 24.25±1.94† | 65.64±2.73† | 10.11±1.33  |
|                 |        | 0.05                   | 9.42±1.11†  | 0.00†       | 99.21±2.11† | 0.78±0.68†  | 7.31±0.77†  | 4.79±0.33†  | 79.49±2.41† | 15.72±1.12* | 0.32±0.22   | 56.59±2.51  | 20.25±1.13* | 23.16±1.91  | 0.24±0.14   | 15.33±1.84† | 80.24±3.55† | 4.43±0.52*  |
|                 |        | 0.1                    | 13.38±1.68† | 0.00†       | 100.00†     | 0.00†       | 9.87±0.57†  | 1.88±0.34†  | 96.76±2.38† | 1.37±0.27†  | 1.10±0.27*  | 57.84±2.45  | 15.88±1.24† | 26.28±1.41† | 0.31±0.15   | 16.33±1.63† | 83.67±2.65† | 0.00†       |
|                 |        | 0.5                    | 14.25±1.87† | 0.00†       | 100.00†     | 0.00†       | 13.65±0.75† | 0.00†       | 100.00†     | 0.00†       | 1.03±0.32*  | 42.99±2.93† | 36.74±2.61† | 20.27±2.21  | 0.35±0.11   | 0.00†       | 100.00†     | 0.00†       |
|                 |        | 1                      | 24.62±1.83† | 0.00†       | 100.00†     | 0.00†       | 19.23±1.34† | 0.00†       | 100.00†     | 0.00†       | 3.05±0.39†  | 43.57±3.01† | 54.18±2.21† | 2.24±1.15†  | 9.39±0.43†  | 0.00†       | 100.00†     | 0.00†       |
|                 | 9NC-LP | Control                | 1.81±0.19   | 55.75±1.70  | 35.46±1.35  | 8.78±1.27   | 1.26±0.28   | 56.49±1.53  | 31.62±1.15  | 11.89±0.93  | 0.23±0.11   | 56.99±1.29  | 30.99±1.15  | 12.02±0.67  | 0.75±0.27   | 59.92±1.87  | 30.59±1.65  | 9.49±1.45   |
|                 |        | 0.01                   | 2.21±0.30   | 50.22±3.59  | 36.97±2.33  | 12.81±2.41  | 2.09±0.56   | 55.83±2.26  | 31.74±2.21  | 12.44±1.78  | 2.62±0.13†  | 64.81±2.56* | 29.36±2.17  | 5.83±0.74†  | 0.74±0.17   | 33.45±1.71† | 46.84±1.84† | 19.72±1.37† |
|                 |        | 0.025                  | 2.96±0.54   | 32.47±3.50† | 41.41±2.49* | 26.12±1.99† | 3.71±0.65†  | 36.09±2.57† | 39.57±2.31* | 24.33±1.42† | 2.61±0.24†  | 59.84±2.24  | 32.99±2.19  | 7.17±0.58†  | 0.82±0.26   | 26.19±0.82† | 69.06±2.18† | 4.75±0.55*  |
|                 |        | 0.05                   | 3.43±0.51*  | 4.89±0.44†  | 62.83±4.08† | 32.28±2.45† | 3.88±0.36†  | 7.66±1.08†  | 59.24±2.65† | 33.09±1.66† | 3.23±0.18†  | 60.22±2.77  | 38.45±1.98† | 1.33±0.24†  | 1.27±0.47   | 24.89±2.05† | 75.11±2.39† | 0.00†       |
|                 |        | 0.1                    | 18.48±1.64† | 34.80±3.62† | 65.20±2.89† | 0.00†       | 17.52±1.28† | 3.88±0.69†  | 89.76±2.93† | 6.37±1.04†  | 4.08±0.26†  | 58.16±2.37  | 41.22±2.31† | 0.63±0.72†  | 1.25±0.86   | 3.75±0.97†  | 96.25±2.46† | 0.00†       |
|                 |        | 0.5                    | 21.92±2.13† | 0.00†       | 100.00†     | 0.00†       | 20.19±1.16† | 1.56±1.71†  | 98.43±2.84† | 0.00†       | 4.19±0.18†  | 60.64±2.49  | 38.56±1.03† | 0.80±0.61†  | 1.94±0.43*  | 16.46±0.77† | 83.54±2.19† | 0.00†       |
|                 |        | 1                      | 40.67±2.47† | 0.00†       | 100.00†     | 0.00†       | 34.78±1.57† | 0.00†       | 100.00†     | 0.00†       | 5.04±0.22†  | 71.71±2.79† | 26.81±2.54  | 1.48±0.78†  | 10.81±0.45† | 57.39±2.22  | 42.61±1.87† | 0.00†       |
|                 | 48h    | 9NC                    | Control     | 1.66±0.33   | 58.36±3.29  | 31.05±1.88  | 10.59±1.29  | 1.55±0.29   | 60.47±1.68  | 28.38±1.43  | 11.16±1.33  | 1.69±0.23   | 68.89±1.71  | 21.7±1.31   | 9.41±1.61   | 1.43±0.32   | 68.1±2.34   | 19.89±1.67  |
| 0.01            |        |                        | 8.58±0.73†  | 43.77±3.56† | 27.94±2.51  | 28.29±3.49† | 6.74±1.26†  | 48.35±2.62† | 26.83±2.57  | 24.81±1.61† | 1.47±0.24   | 78.76±2.69† | 16.44±1.84* | 4.80±0.69*  | 5.32±0.66†  | 41.67±1.86† | 19.3±2.20   | 39.03±1.49† |
| 0.025           |        |                        | 9.28±1.22†  | 31.19±2.49† | 26.83±3.09  | 41.98±3.57† | 7.97±1.63†  | 38.22±2.58† | 24.64±2.49† | 37.15±2.18† | 2.77±0.39*  | 82.09±2.75† | 14.02±1.67† | 3.89±0.63*  | 6.58±0.47†  | 21.93±1.68† | 20.03±1.35  | 58.03±2.26† |
| 0.05            |        |                        | 27.17±1.98† | 22.63±2.89† | 1.56±0.77†  | 75.81±2.34† | 23.22±2.34† | 28.51±1.61† | 6.32±1.55†  | 65.17±3.03† | 4.93±0.22†  | 68.14±3.35  | 21.82±1.90  | 10.05±0.37  | 12.16±0.83† | 10.47±1.28† | 44.99±2.81† | 44.54±2.29† |
| 0.1             |        |                        | 50.78±2.31† | 13.56±0.72† | 75.30±2.89† | 11.14±0.68  | 42.85±2.31† | 16.38±2.09† | 58.85±2.05† | 24.77±2.12† | 4.16±0.26†  | 68.52±3.15  | 18.19±2.12  | 13.29±0.29* | 19.15±1.01† | 0.78±0.32†  | 90.74±3.00† | 8.48±0.54*  |
| 0.5             |        |                        | 53.09±2.37† | 0.00†       | 92.53±3.13† | 7.47±0.82*  | 49.64±2.30† | 1.06±0.44†  | 86.47±1.70† | 12.48±1.88  | 4.51±0.37†  | 28.39±2.41† | 39.29±2.34† | 32.32±1.81† | 14.37±1.09† | 3.01±0.23†  | 91.63±3.64† | 5.36±0.76†  |
| 1               |        |                        | 62.75±3.43† | 0.00†       | 100.00†     | 0.00†       | 51.62±2.07† | 0.00†       | 98.28±1.85† | 1.71±0.36†  | 5.09±0.43†  | 28.74±2.90† | 62.22±3.08† | 9.04±0.24   | 30.39±1.12† | 10.2±1.17†  | 81.88±3.07† | 7.91±1.06*  |
| 9NC-LP          |        | Control                | 1.56±0.30   | 57.39±3.80  | 32.04±2.28  | 10.58±0.74  | 1.67±0.55   | 59.57±1.69  | 27.84±1.32  | 12.58±1.91  | 1.71±0.21   | 67.93±1.80  | 21.43±1.28  | 10.64±1.11  | 1.06±0.31   | 66.81±2.42  | 19.74±1.18  | 13.45±1.12  |
|                 |        | 0.01                   | 8.44±0.69†  | 40.36±2.21† | 30.88±3.83  | 28.76±0.98† | 7.51±1.35†  | 40.84±2.59† | 27.62±2.53  | 31.53±1.71† | 2.04±0.32   | 67.14±2.87  | 22.18±1.55  | 10.68±2.21  | 5.91±0.29†  | 25.12±1.62† | 23.81±1.32* | 51.08±2.13† |
|                 |        | 0.025                  | 19.01±1.28† | 24.65±2.26† | 8.07±0.17†  | 67.28±3.99† | 16.37±1.35† | 29.04±2.61† | 12.29±1.62† | 58.68±2.71† | 2.76±0.35*  | 32.13±2.13† | 21.28±2.11  | 46.59±3.02† | 7.58±0.64†  | 12.12±0.22† | 22.72±1.87  | 65.16±2.98† |
|                 |        | 0.05                   | 45.51±2.49† | 11.15±0.33† | 1.94±0.27†  | 86.91±2.99† | 39.24±2.38† | 9.44±1.34†  | 6.83±1.65†  | 83.74±2.55† | 3.55±0.36†  | 28.73±2.71† | 45.39±3.18† | 25.87±2.42† | 8.42±0.66†  | 11.85±0.16† | 13.95±0.17† | 74.2±2.71†  |
|                 |        | 0.1                    | 57.92±3.17† | 8.39±1.86†  | 64.87±4.39† | 26.74±2.26† | 51.62±3.06† | 0.49±0.32†  | 49.04±2.34† | 50.48±2.75† | 5.04±0.42†  | 43.82±2.72† | 40.22±2.93† | 15.96±1.53† | 13.09±0.47† | 5.03±0.33†  | 70.14±3.22† | 24.83±2.26† |
|                 |        | 0.5                    | 64.78±3.28† | 0.00†       | 92.17±5.01† | 7.83±0.22*  | 59.57±2.39† | 0.00†       | 78.66±2.32† | 21.35±1.24† | 5.66±0.43†  | 24.64±3.08† | 43.35±3.61† | 32.01±3.14† | 17.51±0.72† | 0.00†       | 94.35±3.96† | 5.65±0.39†  |
|                 |        | 1                      | 61.21±3.33† | 0.00†       | 98.53±4.14† | 1.47±1.20†  | 66.71±3.17† | 0.00†       | 90.36±2.85† | 9.64±1.84   | 5.49±0.47†  | 49.07±3.29† | 46.15±2.85† | 4.78±0.73†  | 37.56±0.76† | 10.10±0.18† | 87.97±3.6†  | 1.93±0.21†  |
| 72h             |        | 9NC                    | Control     | 1.78±0.73   | 65.20±1.94  | 23.55±1.88  | 11.25±2.32  | 1.82±0.46   | 67.67±2.17  | 22.31±1.34  | 10.03±1.62  | 2.09±0.37   | 71.31±1.25  | 21.00±1.08  | 7.69±1.70   | 1.43±0.45   | 69.35±2.37  | 21.33±1.74  |
|                 | 0.01   |                        | 9.51±1.23†  | 58.61±3.71  | 22.80±2.28  | 18.59±2.22† | 8.73±1.93†  | 63.37±2.81  | 21.62±2.17  | 15.02±2.21* | 2.11±0.43   | 72.99±3.32  | 19.34±1.61  | 7.67±0.45   | 6.69±0.69†  | 56.31±2.67† | 24.66±2.05  | 19.03±1.18† |
|                 | 0.025  |                        | 18.34±1.68† | 32.37±2.94† | 22.97±2.86  | 44.66±4.36† | 15.47±1.36† | 45.01±2.59† | 22.51±2.03  | 32.49±2.67† | 2.92±0.59   | 72.70±3.11  | 19.93±1.35  | 7.37±0.71   | 9.58±0.74†  | 22.03±2.14† | 24.21±2.22  | 53.76±3.52† |
|                 | 0.05   |                        | 45.21±3.22† | 3.93±1.23†  | 24.71±3.23  | 71.36±5.76† | 29.54±3.14† | 15.10±2.20† | 21.16±2.53  | 63.73±2.49† | 4.25±0.36†  | 60.04±3.74* | 25.74±2.17* | 14.23±1.38† | 9.83±0.75†  | 9.75±1.32†  | 20.11±1.96  | 70.14±3.39† |
|                 | 0.1    |                        | 58.84±3.61† | 0.19±0.96†  | 0.00†       | 99.81±4.87† | 47.66±3.02† | 3.23±1.11†  | 17.34±1.93* | 79.44±3.32† | 6.01±0.82†  | 67.04±3.03  | 20.53±2.03  | 12.43±1.12* | 14.06±0.88† | 5.72±0.87†  | 4.3±0.33†   | 89.98±4.68† |
|                 | 0.5    |                        | 64.91±3.98† | 9.37±1.67†  | 13.78±2.14† | 76.85±4.22† | 59.39±3.49† | 1.76±1.31†  | 0.00†       | 98.25±3.56† | 6.03±1.37†  | 29.89±2.55† | 31.51±2.97* | 38.60±2.98† | 21.97±0.74† | 0.00†       | 83.76±3.48† | 16.24±1.53† |
|                 | 1      |                        | 73.34±4.33† | 4.38±1.42†  | 19.87±2.31  | 75.75±4.56† | 63.27±2.97† | 6.72±1.80†  | 5.56±1.28†  | 87.72±3.24† | 15.53±1.53† | 39.72±3.07† | 36.72±2.84† | 23.56±2.32† | 33.57±0.63† | 0.00†       | 76.34±3.47† | 23.66±2.6†  |
|                 | 9NC-LP | Control                | 1.92±0.37   | 66.69±2.19  | 25.24±2.07  | 8.07±1.26   | 1.99±0.76   | 68.52±1.98  | 23.24±1.45  | 8.25±1.75   | 2.15±0.38   | 73.08±1.93  | 21.21±1.24  | 5.71±0.76   | 1.81±0.44   | 69.97±2.87  | 19.31±1.21  | 10.72±1.09  |
|                 |        | 0.01                   | 10.22±2.47† | 42.35±3.93† | 25.47±3.71  | 32.17±2.78† | 9.54±1.32†  | 56.05±2.75† | 22.18±2.48  | 21.76±2.61† | 2.85±0.68   | 75.12±2.54  | 18.97±1.37  | 5.91±1.42   | 5.56±0.89†  | 9.71±1.01†  | 2.17±0.36†  | 88.11±3.64† |
|                 |        | 0.025                  | 26.73±3.45† | 17.82±2.19† | 20.82±3.58  | 61.37±4.16† | 24.49±2.90† | 34.09±2.37† | 16.57±2.11* | 49.35±2.93† | 3.03±0.77   | 73.70±3.56  | 22.05±2.21  | 4.25±1.17   | 8.29±0.69†  | 4.75±1.02†  | 0.33±0.28†  | 94.92±3.24† |
|                 |        | 0.05                   | 57.59±4.89† | 3.04±1.27†  | 1.65±1.29†  | 95.31±4.65† | 49.17±3.21† | 16.45±2.16† | 7.12±2.09†  | 76.43±3.64† | 5.05±0.71†  | 70.25±3.55  | 20.15±2.38  | 9.60±1.27*  | 10.31±0.69† | 0.32±0.19†  | 1.32±0.36†  | 98.36±4.38† |
|                 |        | 0.1                    | 66.48±3.23† | 1.46±0.56†  | 3.33±0.17†  | 95.21±3.76† | 57.32±3.08† | 7.12±0.87†  | 0.13±0.33†  | 92.76±3.55† | 6.91±0.83†  | 66.69±3.81  | 20.61±3.20  | 12.70±2.93* | 16.18±0.84† | 5.40±0.83†  | 7.4±1.24†   | 87.2±3.74†  |
|                 |        | 0.5                    | 74.77±4.31† | 3.67±0.77†  | 14.81±1.32† | 81.52±3.89† | 63.14±3.81† | 0.00†       | 0.60±0.35†  | 99.39±3.12† | 7.67±1.75†  | 24.49±3.94† | 39.33±3.10† | 36.17±3.21† | 22.86±0.72† | 0.00†       | 29.35±2.52† | 70.65±4.22† |
|                 |        | 1                      | 70.46±3.82† | 0.04±0.32†  | 20.72±4.27  | 79.24±2.97† | 65.83±2.72† | 0.38±0.47†  | 10.52±2.74† | 89.10±3.03† | 18.28±1.48† | 39.4±3.06†  | 42.06±2.62† | 18.54±3.34† | 35.45±0.74† | 0.00†       | 50.39±3.58† | 49.61±2.84† |

Cell treated with 4%DMSO as control in 9NC group, Cell treated with Liposomes (free) as control in 9NC-LP group. \*P < 0.05, †P < 0.01 compared with the controls.
